# Supplementary material for: Identification and fine mapping of qPBR10-1, a novel locus controlling panicle blast resistance in Pigm-containing P/TGMS line
Source: Research Square preprint supplement (doi:10.21203/rs.3.rs-850447/v1), 2021-08-30
Supplement: Supplementary file 1 [file 0f9eeb9bb7732e5c2796bba5.xlsx]

## Sheet: Sheet1
Table S2 Summary of PCR primer sequences
Primer name	Marker type	Forward primer	Reverse primer	Use of primers
				Pigm Detection
S29742		CAGTGAAACGAACGCTATG	AATAGGAAGGGTTGATGTTG
M80375		GACGAGTAAACGAGAAGTCACG	GGACAACCATATTCCCCTAAGA
ZJ58.7		ACTTGCTGGGAGAAGGATT	AGTTCGTACTTTTCAGGCT
				Gene mapping
RM25375	SSR	TGTAGCTGCACATCTCCTTCAGC	GCTCATCTCCAAGCTGCAGTCC
RM25384	SSR	GGTGACCTGTGATGATGATATGC	CCAGACAGAGATTGAGAGATACAAGC
RM25387	SSR	GGGATCGTCTTCCCGAACAGC	CTTGGGTGAGATGGGTGAGTGC
ID1846	InDel	CCGTGGCTTAGGAAAAGGGA	CATACTTCCTCCGTCGGACA
K394	KASP	GAAGGTGACCAAGTTCATGCTTGCAATGGTACCACCCTTAGTTTC	AGAATGACAATGGGATCCAACTCT
		GAAGGTCGGAGTCAACGGATTTGCAATGGTACCACCCTTAGTTTT
ID338	InDel	CTAATTGTCCCTAGGCTTAATAT	AGAAATAGAAACTTGGATGAACT
K1401	KASP	GAAGGTGACCAAGTTCATGCTGCAAAATGTGAACTACTCCCTCCA	TACATTGTGAAAGTTTAGGGTCGG
		GAAGGTCGGAGTCAACGGATTGCAAAATGTGAACTACTCCCTCCG
K1407	KASP	AGACTTGCCATTGACGATGAAATC	GAAGGTGACCAAGTTCATGCTCGCCGAAGCACCATTGAC
			GAAGGTCGGAGTCAACGGATTCGCCGAAGCACCATTGAT
ID1286	InDel	AGTACCACAGCACTGTTGGT	CAAATCGCTGACGTGGCATA
ID4789	InDel	AGGAGCTTTTGAAGGCGAGA	CCTCACTGAGGCTGCTCATT
RM5806	SSR	GAATGCTAATTGCGGTTGAAGC	GGATCTTTCCTCCCAATCTTTGC
				qRT-PCR detection
PigmR		TTCCTTTCTCTTTATCATAATT	AGATTCCAACCTGCACTTGCCT	PigmR
OsActin1		GTCCTCTTCCAGCCTTCCTT	TACCACCACTGAGAACGATGT	Internal reference
QRT-720		TAGGGCCGCAAATTCACAGGAG	AATGCCTCAACCCACCGCTTAG	ORF1
QRT-730		TTGTCCTACTGTCCGCCTACAC	TGTTGCCGCTAGCCTCTTTCTG	ORF2
QRT-740		GCTCTTGTGGCTACTCCAAA	TGTCACCAATGGTCTGCTCT	ORF3
QRT-750		GATCGATGCCGTGCCTAAAG	AATCGACTCCTCCCGTCTTG	ORF4
