# Supplementary material for: Identification and fine mapping of qPBR10-1, a novel locus controlling panicle blast resistance in Pigm-containing P/TGMS line
Source: Research Square preprint supplement (doi:10.21203/rs.3.rs-850447/v1), 2021-08-30
Supplement: Supplementary file 2 [file 321bba801c8040cfe2f3a7ab.xlsx]

## Sheet: Sheet1
Table 1 Summary of SNP markers characteristics in the F2 population
Chromosome	No. of SNP markers used	Chromosome length coverage (bp)	Genetic length (cM)	No. of SNP markers/cM	Minimum interval (cM)	Maximum interval (cM)
1	287	43237333	149.24	1.92	0.22	9.98
2	72	35875736	82.72	0.87	0.27	7.19
3	276	36405799	187.36	1.47	0.28	8.01
4	428	35501387	338.62	1.26	0.27	6.88
5	435	29507277	208.47	2.09	0.24	4.35
6	306	30869147	169.32	1.81	0.27	13.09
7	189	29582943	152.12	1.24	0.21	8.7
8	73	28399689	107.38	0.68	0.27	10.57
9	217	22779506	121.54	1.79	0.25	6.49
10	346	23117196	191.35	1.81	0.28	11.55
11	145	28973227	158.64	0.91	0.28	5.33
12	173	27488377	118.73	1.46	0.27	6.75
Total	2947	371737617	1985.49	-	-	-
Average	245.58	3.09781e+07	165.46	1.48	0.27	8.24
