# Supplementary material for: Identification and fine mapping of qPBR10-1, a novel locus controlling panicle blast resistance in Pigm-containing P/TGMS line
Source: Research Square preprint supplement (doi:10.21203/rs.3.rs-850447/v1), 2021-08-30
Supplement: Supplementary file 3 [file aedaee3b7345c6d7dba29000.xlsx]

## Sheet: Sheet1
Table S3 Panicle blast resistance evaluation of lines harboring Pigm gene using mixed isolates of blast by artificial inoculation (years 2013 to 2015)
Line/Variety	2013			2014			2015
	Diseased grain rate (%)	Resistance evaluation		Diseased grain rate (%)	Resistance evaluation		Diseased grain rate (%)	Resistance evaluation
GM4	1.28±1.08	R		2.78±1.23	R		2.22±0.98	R
MSJ1	2.17±1.32	R		22.27±5.62	R		26.34±4.68	R
MSJ4	5.24±3.42	R		18.24±4.23	R		23.24±4.23	R
MSJ9	16.65±5.36	R		84.82±7.06	S		85.94±6.14	S
MSJ13	2.33±1.25	R		3.45±1.89	R		2.38±1.62	R
MSJ16	20.54±6.67	R		82.38±6.52	S		9148±3.76	S
MSJ18	78.38±10.62	S		89.54±9.22	S		100	S
C134S	91.28±5.46	S		96.23±3.38	S		100	S
